# Supplementary material for: Altered microRNA profiles in plasma exosomes from mesial temporal lobe epilepsy with hippocampal sclerosis
Source: PubMed Central journal article supplement (PMC5354818; doi:10.18632/oncotarget.13744), 2016-12-01
Supplement: oncotarget-08-4136-s001.pdf [file oncotarget-08-4136-s001.pdf]

## Altered microRNA profiles in plasma exosomes from mesial temporal lobe epilepsy with hippocampal sclerosis

### Supplementary Materials

**Supplementary Table S1: Clinical characteristics of mTLE-HS patients and controls for miRNA microarray and qRT-PCR**

| Characteristic  | MiRNA microarray   |                     |          | qRT-PCR             |                      |          |
|-----------------|--------------------|---------------------|----------|---------------------|----------------------|----------|
|                 | MTLE-HS<br>(n = 3) | Controls<br>(n = 3) | <i>P</i> | MTLE-HS<br>(n = 40) | Controls<br>(n = 40) | <i>P</i> |
| Age (mean ± SD) | 28.52 ± 6.2        | 29.63 ± 4.8         | 0.9235   | 27.56 ± 6.3         | 28.72 ± 5.3          | 0.8690   |
| Male/female, n. | 2/1                | 2/1                 | 1        | 25/15               | 22/18                | 0.6500   |

**Supplementary Table S2: Demographic characteristics of patients with mTLE-HS patients and controls**

| Characteristic                              | MTLE-HS (n = 40)      | Controls (n = 40)   | <i>P</i> |
|---------------------------------------------|-----------------------|---------------------|----------|
| Male: Female                                | 25:15                 | 22:18               | 0.6500   |
| Age (range)                                 | 27.56 years (11–49)   | 28.72 years (10–50) | 0.8690   |
| Family history of epilepsy                  | 4 (10%)               | NA                  | NA       |
| Course of epilepsy (range)                  | 14.52 years (1–28)    | NA                  | NA       |
| Onset of seizure (range)                    | 12.45 years (0.5–30)  | NA                  | NA       |
| Seizure frequency (range)(months)           | 35.65 (1–300)         | NA                  | NA       |
| Seizure time (range)                        | 2.65 min (2 s–10 min) | NA                  | NA       |
| Laterality of epileptogenic zone            |                       | NA                  | NA       |
| Right                                       | 15 (40%)              | NA                  | NA       |
| Left                                        | 23 (50%)              | NA                  | NA       |
| Bilateral                                   | 2 (10%)               | NA                  | NA       |
| sampling time from the last seizure (range) | 6.32 days (1–30)      | NA                  | NA       |
| AED therapy at the last clinic visit        |                       |                     |          |
| Valproic acid                               | 25                    | NA                  | NA       |
| Carbamazepine                               | 35                    | NA                  | NA       |
| Levetiracetam                               | 20                    | NA                  | NA       |
| Oxcarbazepine                               | 26                    | NA                  | NA       |
| Lamotrigine                                 | 10                    | NA                  | NA       |
| Topiramate                                  | 6                     | NA                  | NA       |
| Others                                      | 5                     | NA                  | NA       |
| Comorbid conditions                         |                       |                     |          |
| Hypertension                                | 3                     | 2                   | 0.1817   |
| Diabetes                                    | 2                     | 2                   |          |
| Hyperlipidemia                              | 2                     | 1                   |          |
| Others                                      | 0                     | 0                   |          |

NA, not applicable.
